# Supplementary material for: Thiophene-functionalized isoindigo dyes bearing electron donor substituents with absorptions approaching the near infrared region
Source: Royal Society of Chemistry journal article supplement (doi:10.1039/c1ob05508a), 2011-01-01
Supplement: c1ob05508a.pdf [file c1ob05508a.pdf]

Electronic Supporting Information

# Thiophene-functionalized isoindigo dyes bearing electron donor substituents with absorptions approaching the near infrared region

*David Bialas, Sabin-Lucian Suraru, Ralf Schmidt and Frank Würthner\**

Universität Würzburg, Institut für Organische Chemie and Röntgen Research Center for Complex  
Material Systems, Am Hubland, 97074 Würzburg, Germany.

E-mail: [wuerthner@chemie.uni-wuerzburg.de](mailto:wuerthner@chemie.uni-wuerzburg.de); Fax: +49 (0)931 31 84756; Tel: +49 (0)931 31 85340

## Table of contents

|                                 |            |
|---------------------------------|------------|
| <b>1. Computational Details</b> | <b>S2</b>  |
| <b>2. Cyclic voltammetry</b>    | <b>S4</b>  |
| <b>3. NMR spectra</b>           | <b>S5</b>  |
| <b>4. References</b>            | <b>S20</b> |

## 1. Computational Details

The isoindigo derivatives were calculated with the DFT method in combination with the B3-LYP<sup>S1</sup> functional. All calculations were performed with the TURBOMOLE program (version 5.10).<sup>S2</sup> The TZVP<sup>S3</sup> basis for C, N, O, and S atoms was combined with the TZV<sup>S2</sup> basis for the H atom. This basis is designated as TZV(P) and was found to be an excellent compromise between accuracy and computational effort for systems of similar size.<sup>S4</sup> All dyes were fully geometry-optimized, emanating from structures computed on semi-empirical AM1 level. Long alkyl chains were replaced by methyl groups.

Transition densities were calculated on CC2 level with the TZV(P) basis based on the previously geometry-optimized structures using the TURBOMOLE program (version 5.9). In all CC2 computations, the resolution-of-the-identity (RI) approximation was employed.<sup>S5</sup> Corresponding auxiliary basis sets were applied for fitting the charge density.<sup>S6</sup> The frozen core approximation was used to freeze orbitals with eigenvalues smaller than  $-3.0$  a. u. in the calculation of the correlation and excitation energies.

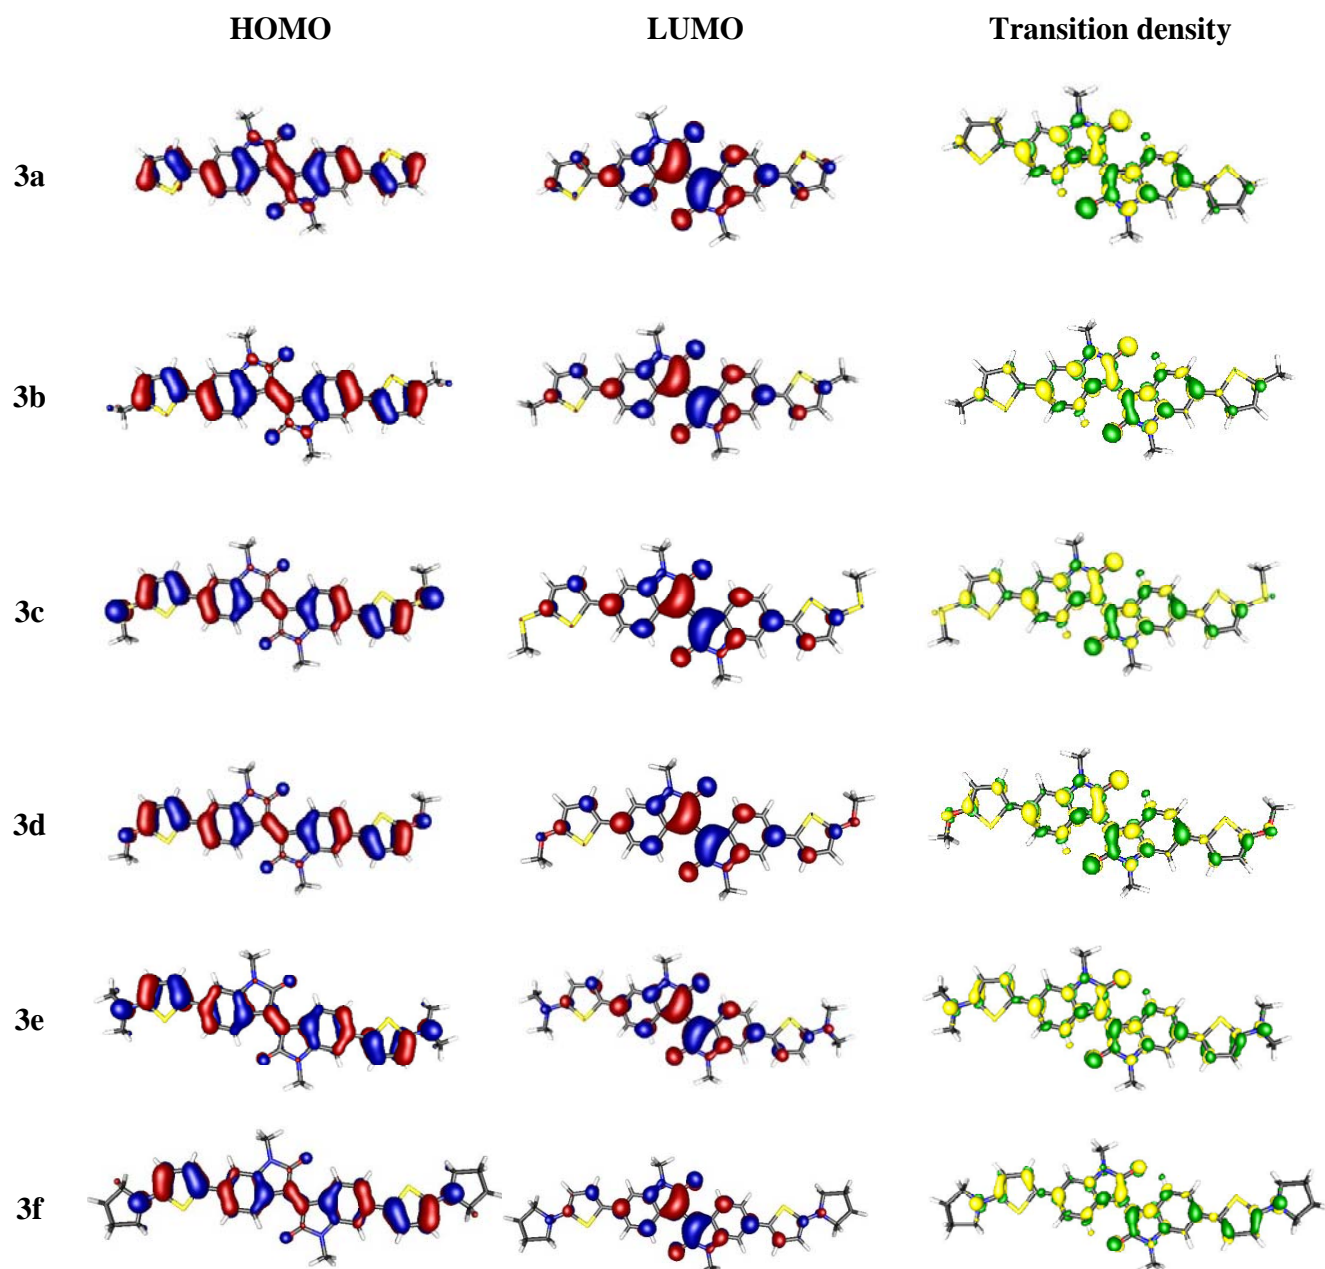

**Fig. S 1** HOMO, LUMO according to DFT (B3-LYP) calculations and transition density (CC2 level) of 3a-f.

## 2. Cyclic voltammetry

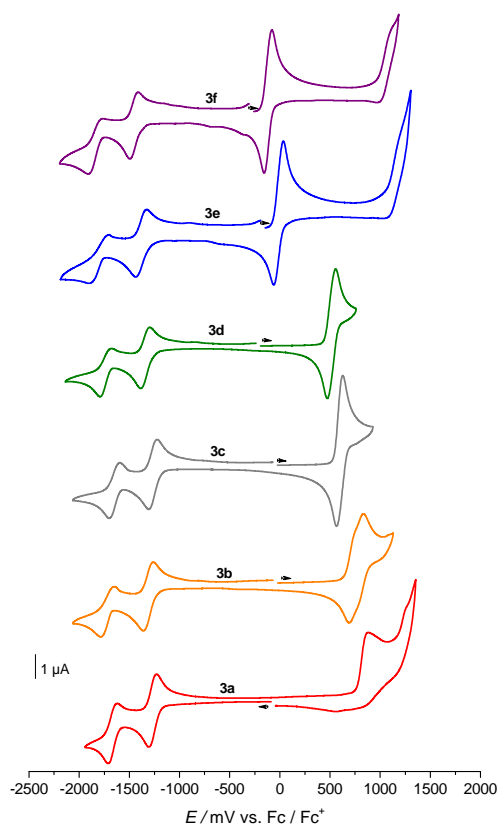

**Fig. S 2** Cyclic voltammograms of **3a-f** in dry dichloromethane ( $10^{-4}$  M); scan rate  $100 \text{ mV s}^{-1}$ ; supporting electrolyte: tetrabutylammonium hexafluorophosphate ( $\text{NBu}_4\text{PF}_6$ , 0.1 M).

### 3. NMR-spectra

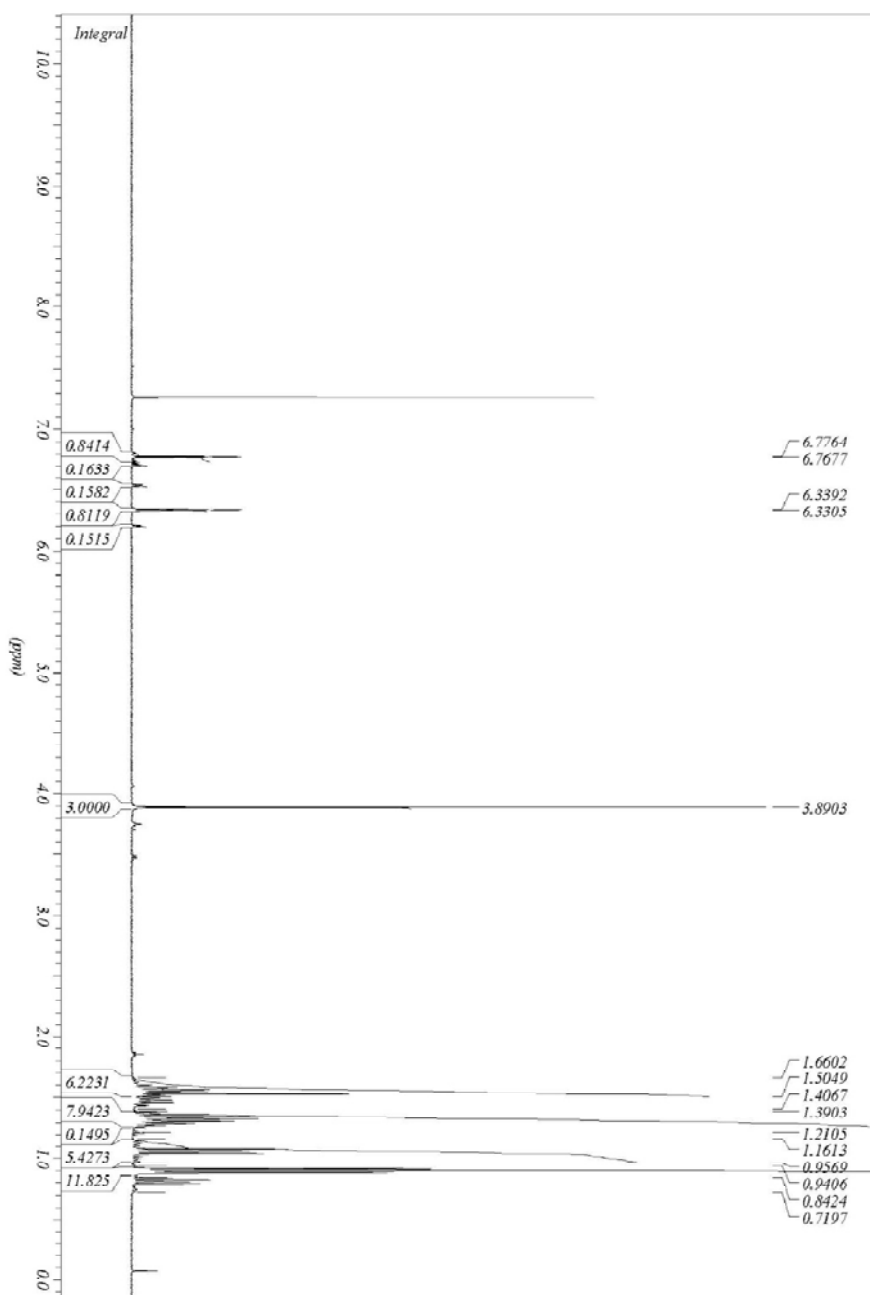

**Fig. S 3** 400 MHz <sup>1</sup>H NMR spectrum of **2d** in CDCl<sub>3</sub>.

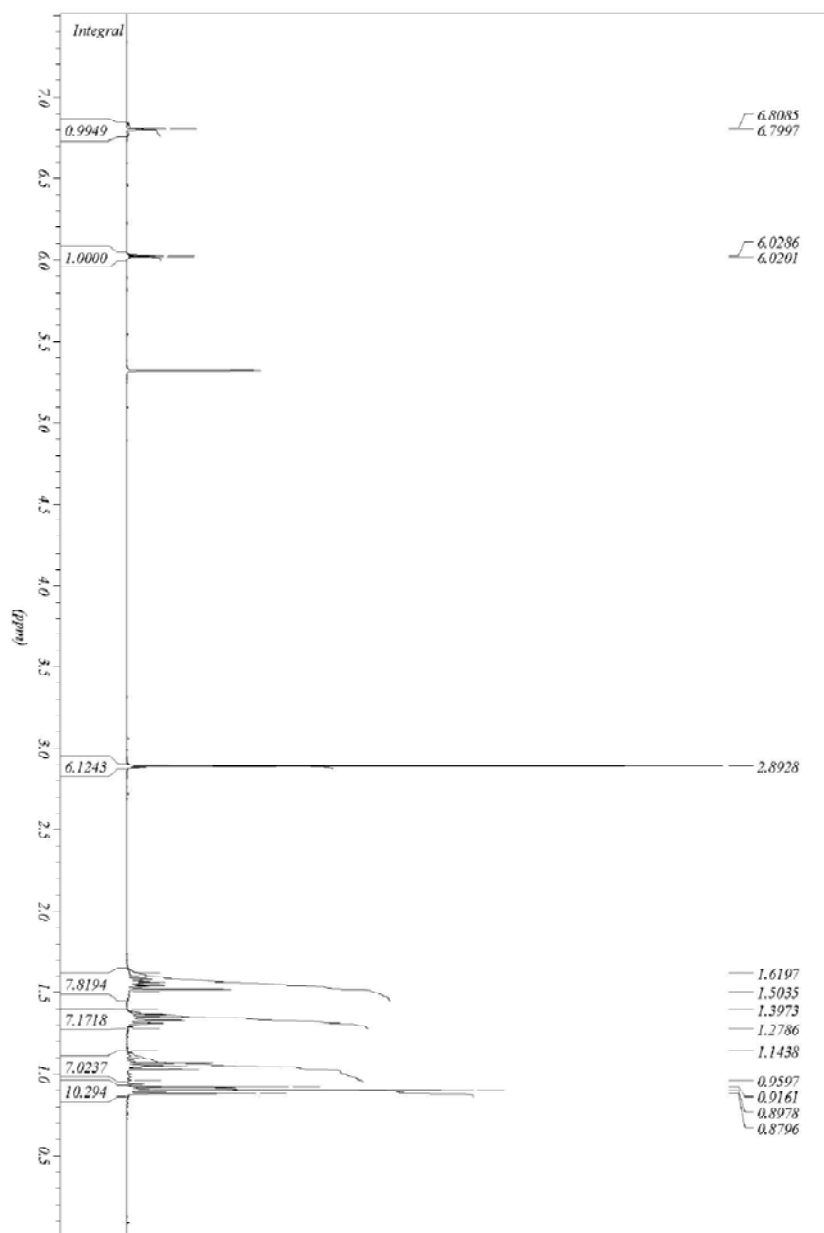

**Fig. S 4** 400 MHz <sup>1</sup>H NMR spectrum of **2e** in CD<sub>2</sub>Cl<sub>2</sub>.

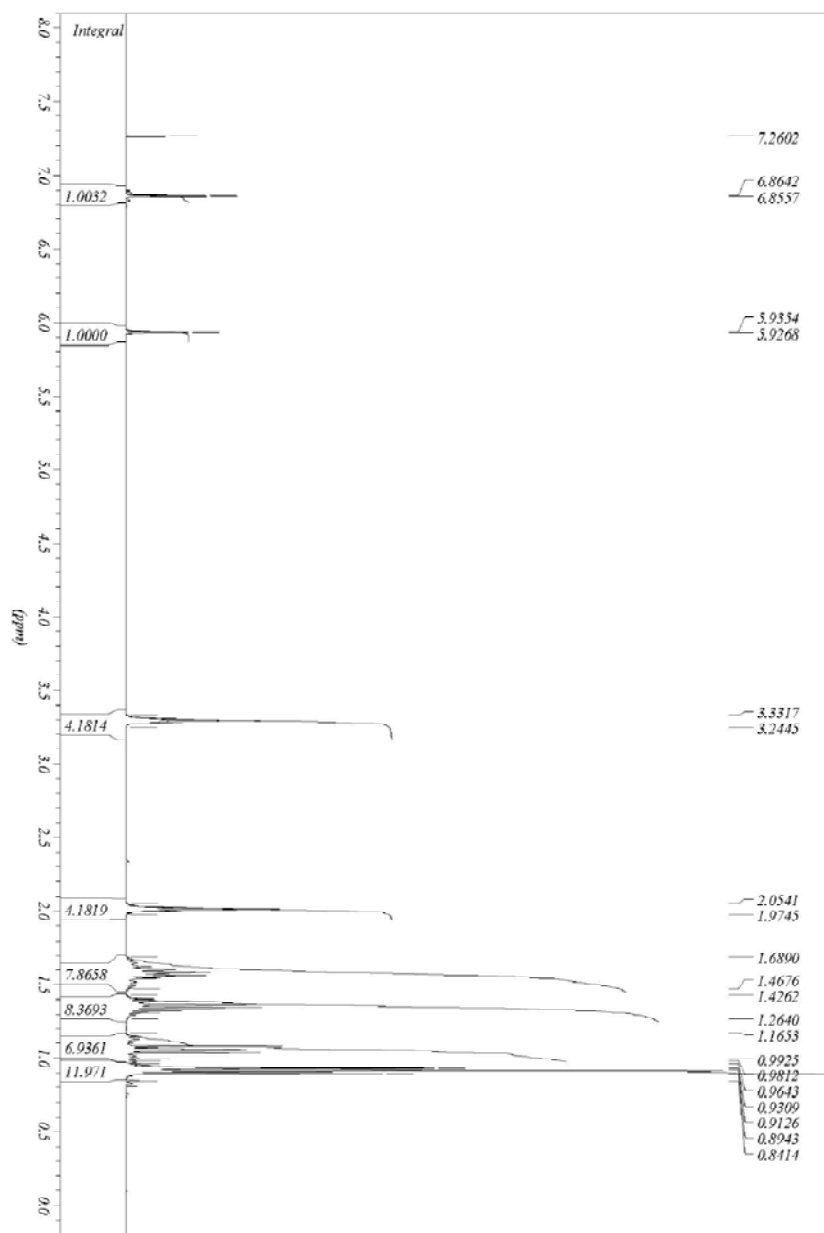

**Fig. S 5** 400 MHz <sup>1</sup>H NMR spectrum of **2f** in CDCl<sub>3</sub>.

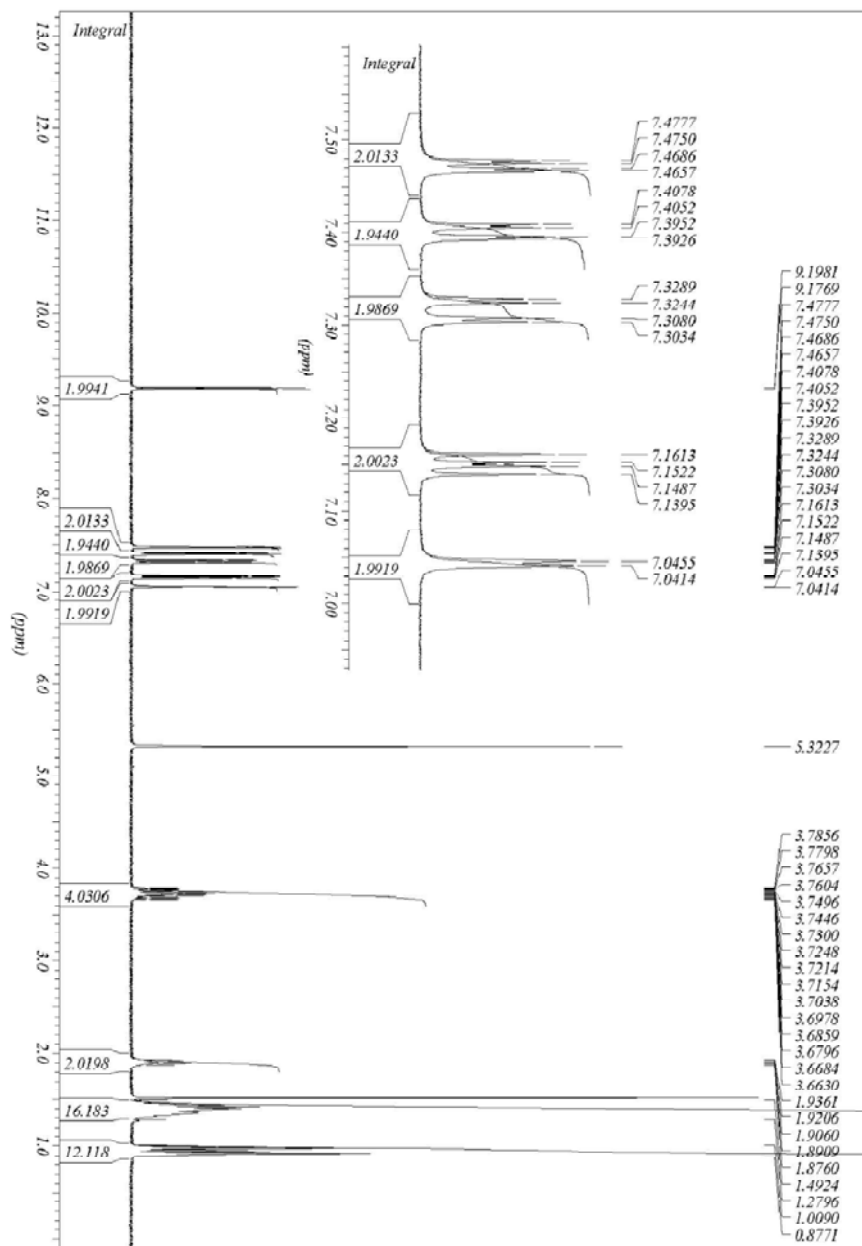

Fig. S 6 400 MHz <sup>1</sup>H NMR spectrum of **3a** in CD<sub>2</sub>Cl<sub>2</sub>.



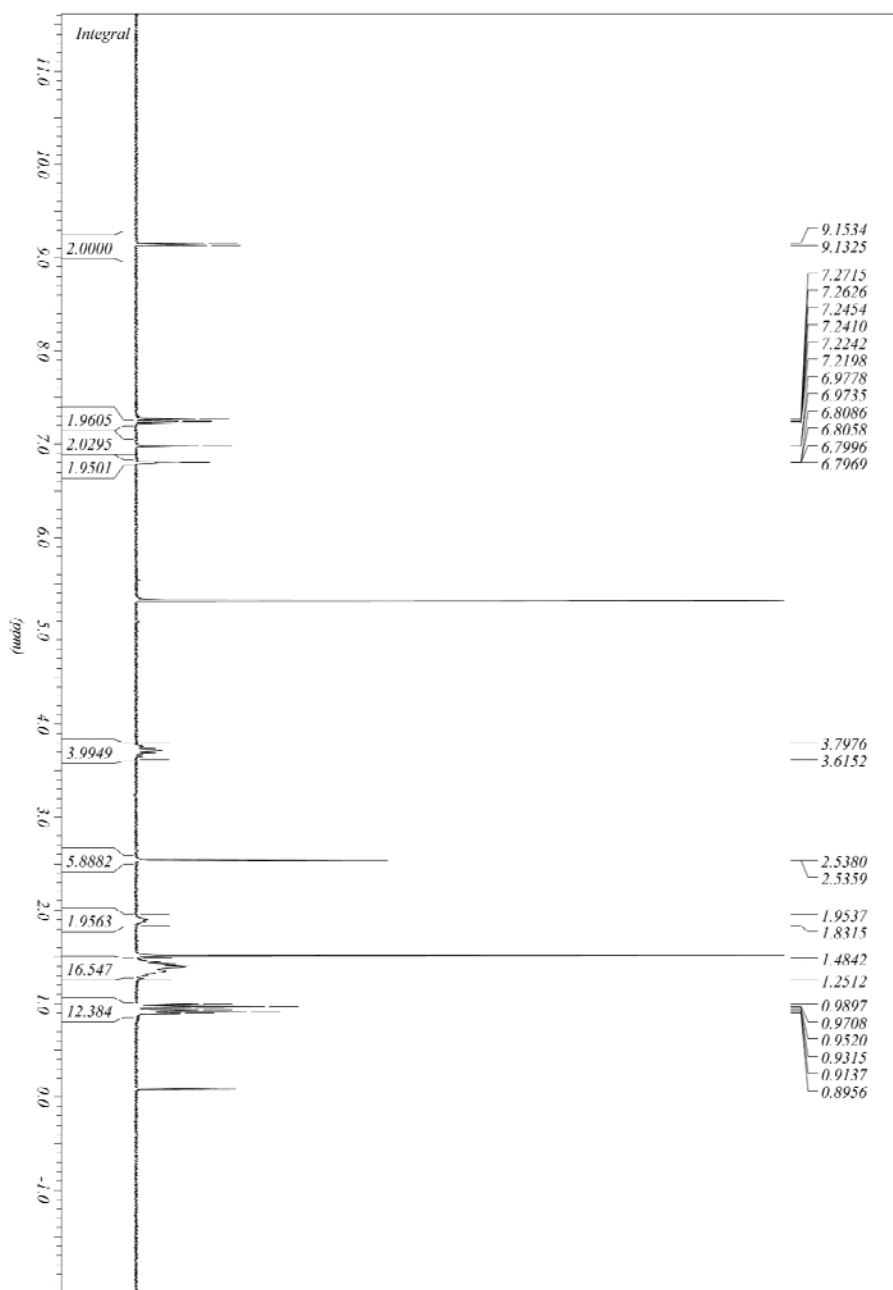

Fig. S 7 400 MHz  $^1\text{H}$  NMR spectrum of **3b** in  $\text{CD}_2\text{Cl}_2$ .

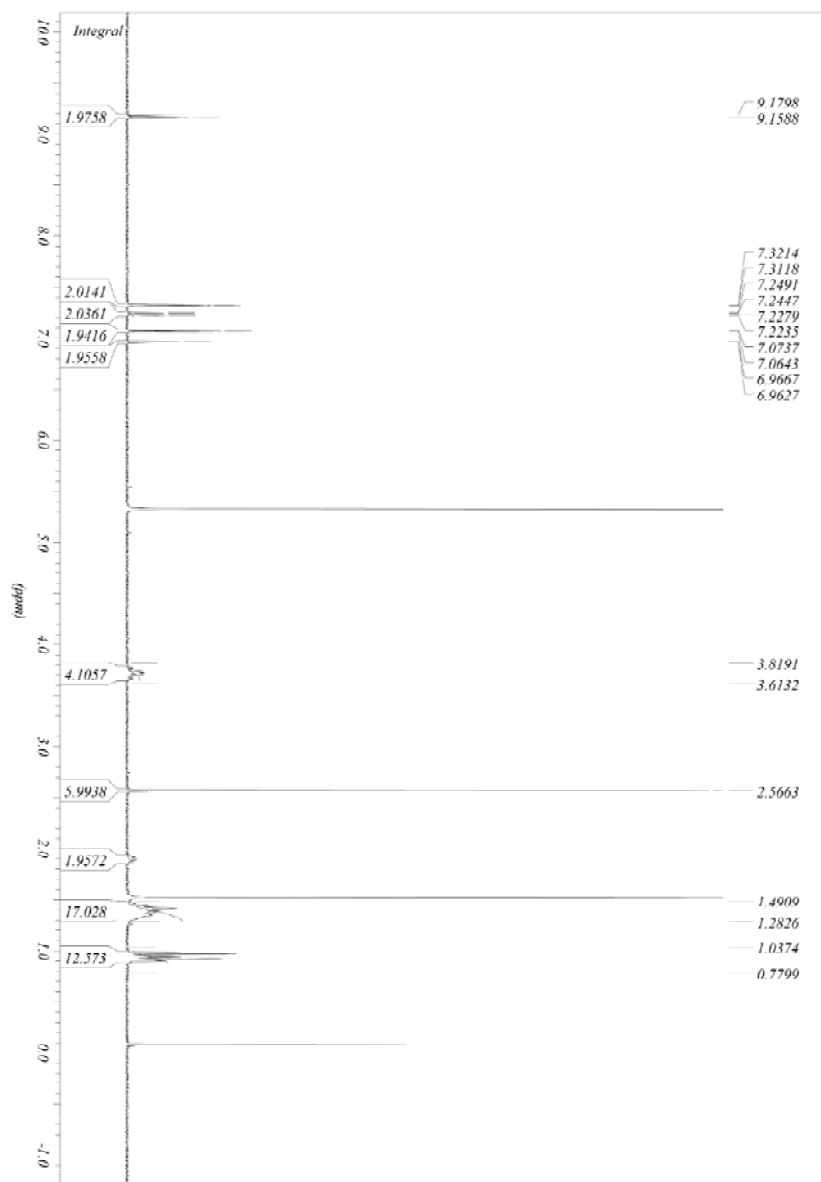

**Fig. S 8** 400 MHz <sup>1</sup>H NMR spectrum of **3c** in CD<sub>2</sub>Cl<sub>2</sub>.

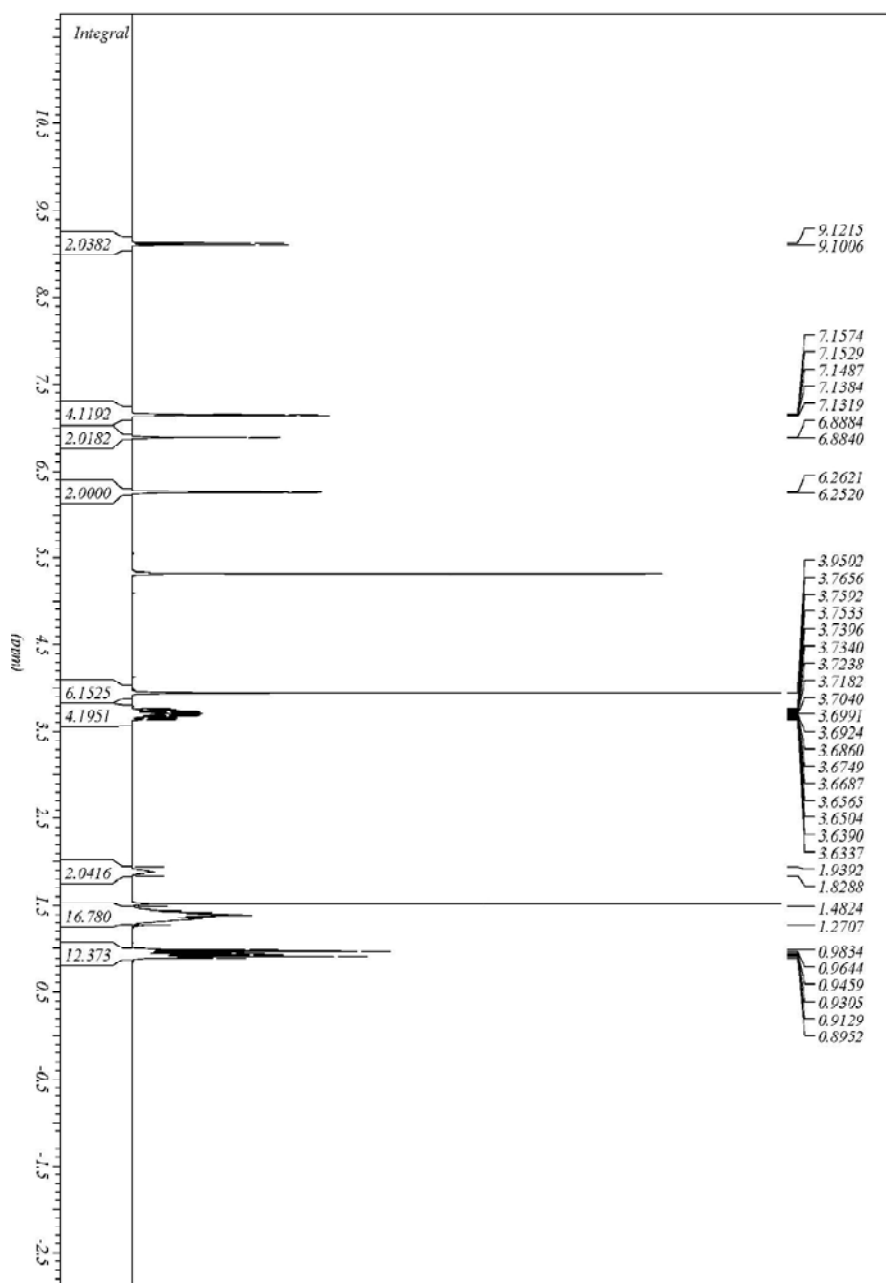

Fig. S 9 400 MHz  $^1\text{H}$  NMR spectrum of **3d** in  $\text{CD}_2\text{Cl}_2$ .

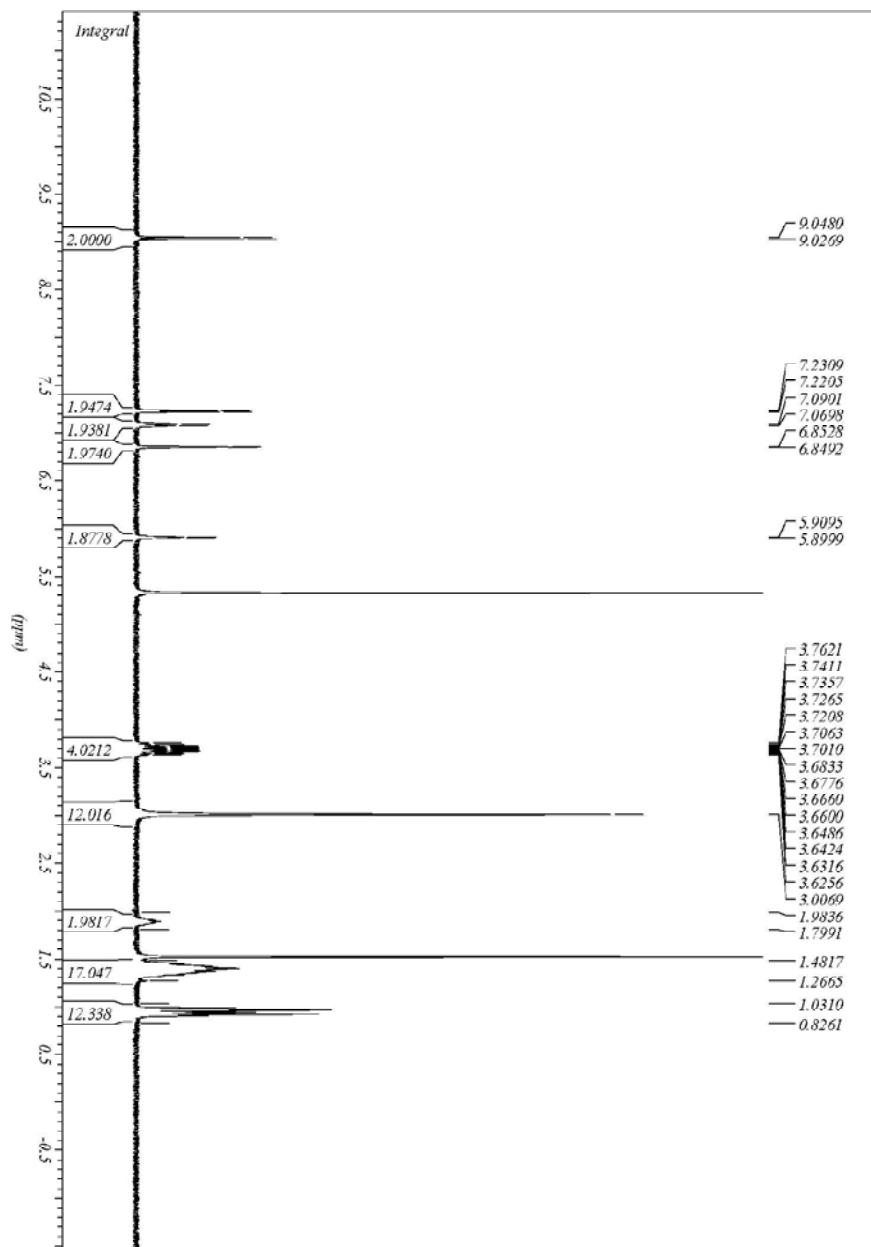

**Fig. S 10** 400 MHz  $^1\text{H}$  NMR spectrum of **3e** in  $\text{CD}_2\text{Cl}_2$ .

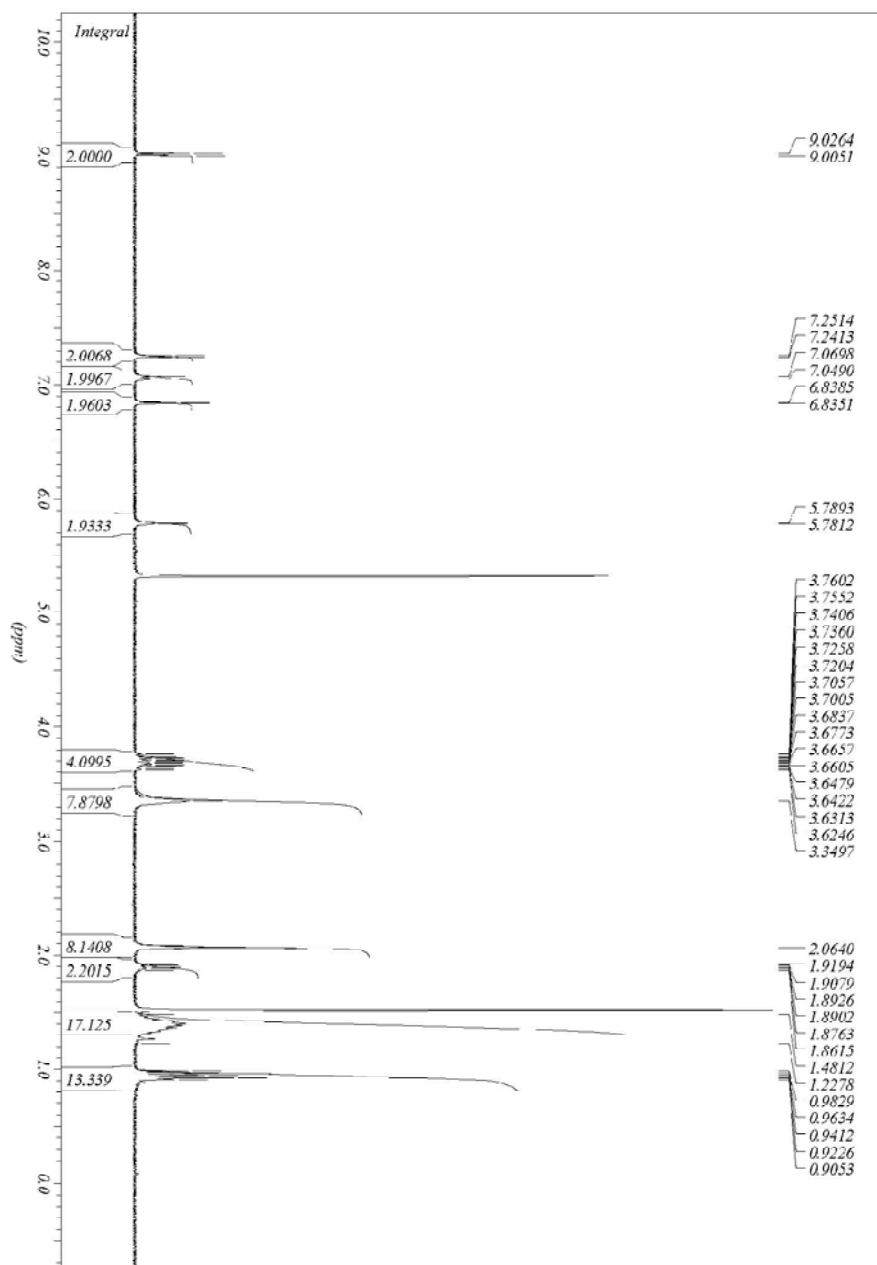

Fig. S 11 400 MHz <sup>1</sup>H NMR spectrum of **3f** in CD<sub>2</sub>Cl<sub>2</sub>.

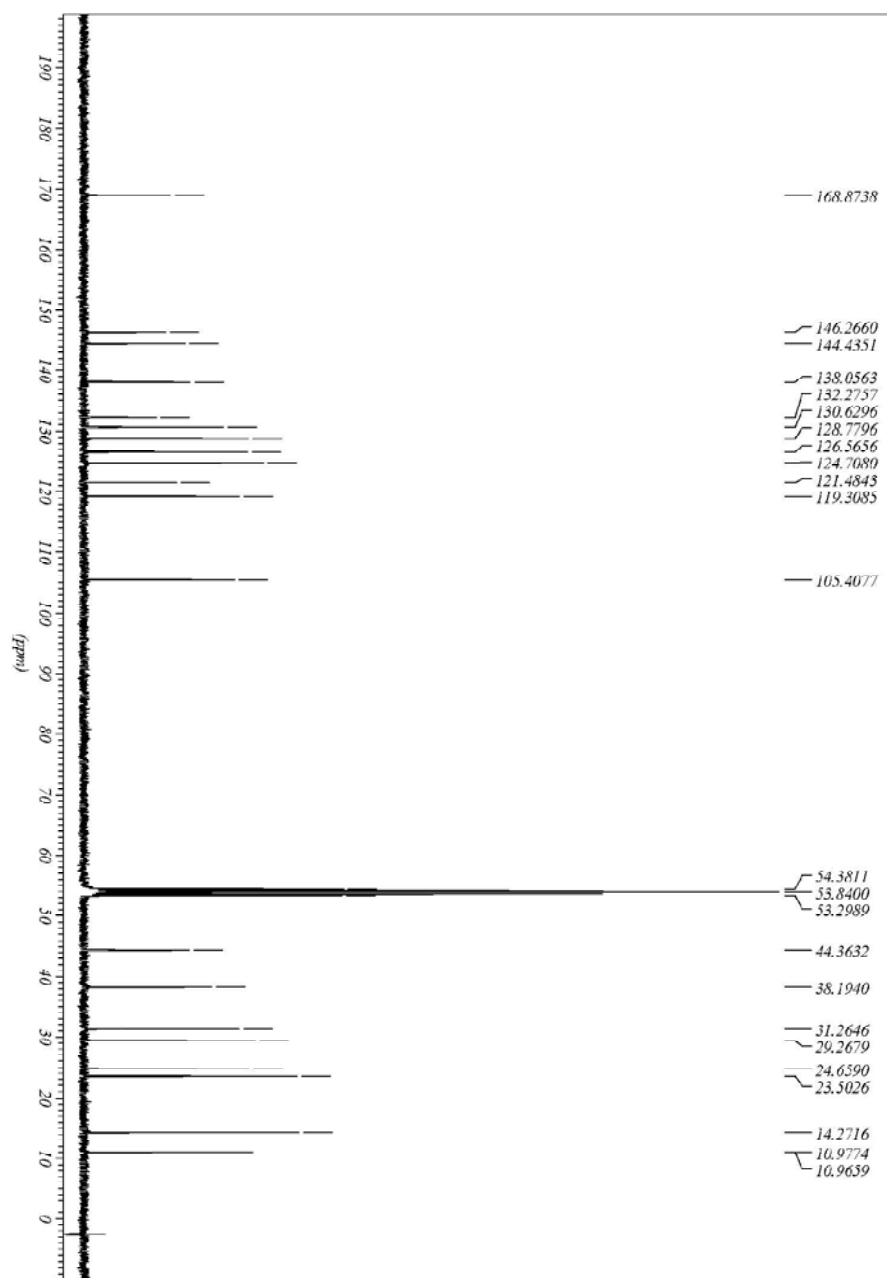

**Fig. S 12** 101 MHz  $^{13}\text{C}$  NMR spectrum of **3a** in  $\text{CD}_2\text{Cl}_2$ .

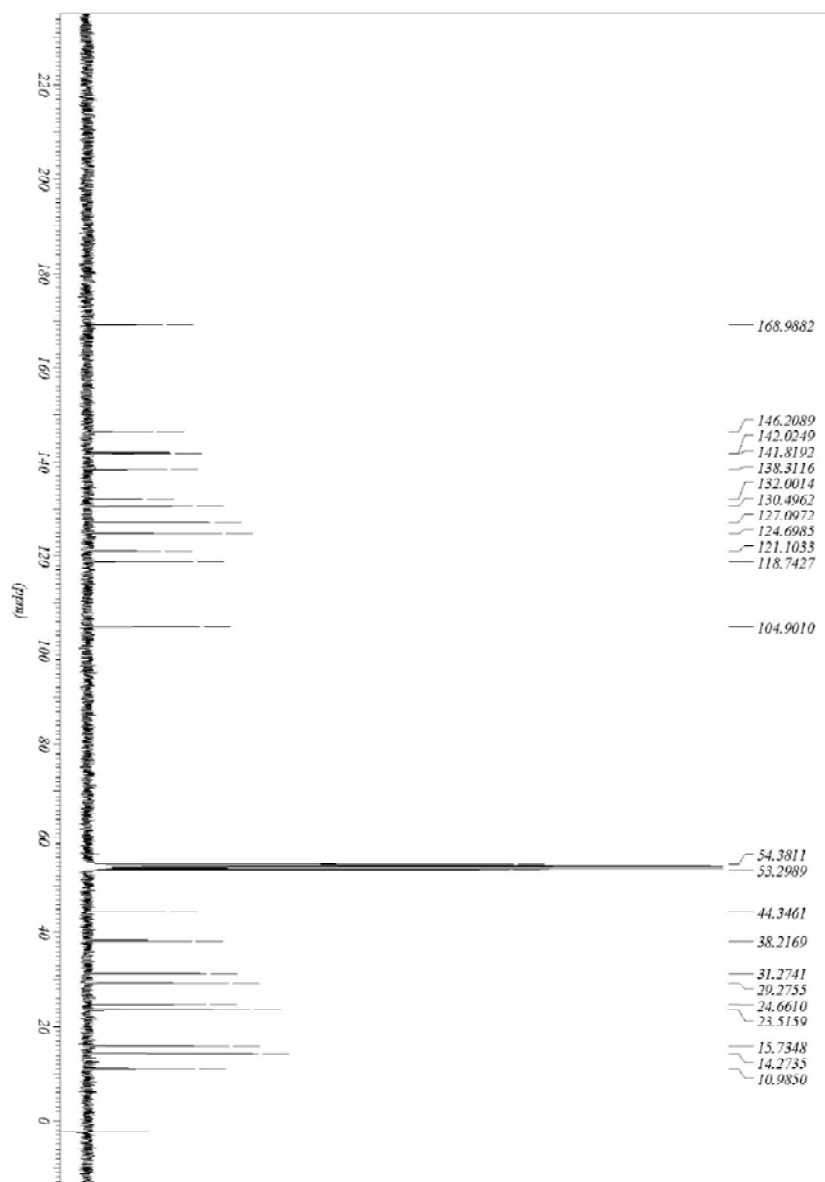

**Fig. S 13** 101 MHz  $^{13}\text{C}$  NMR spectrum of **3b** in  $\text{CD}_2\text{Cl}_2$ .

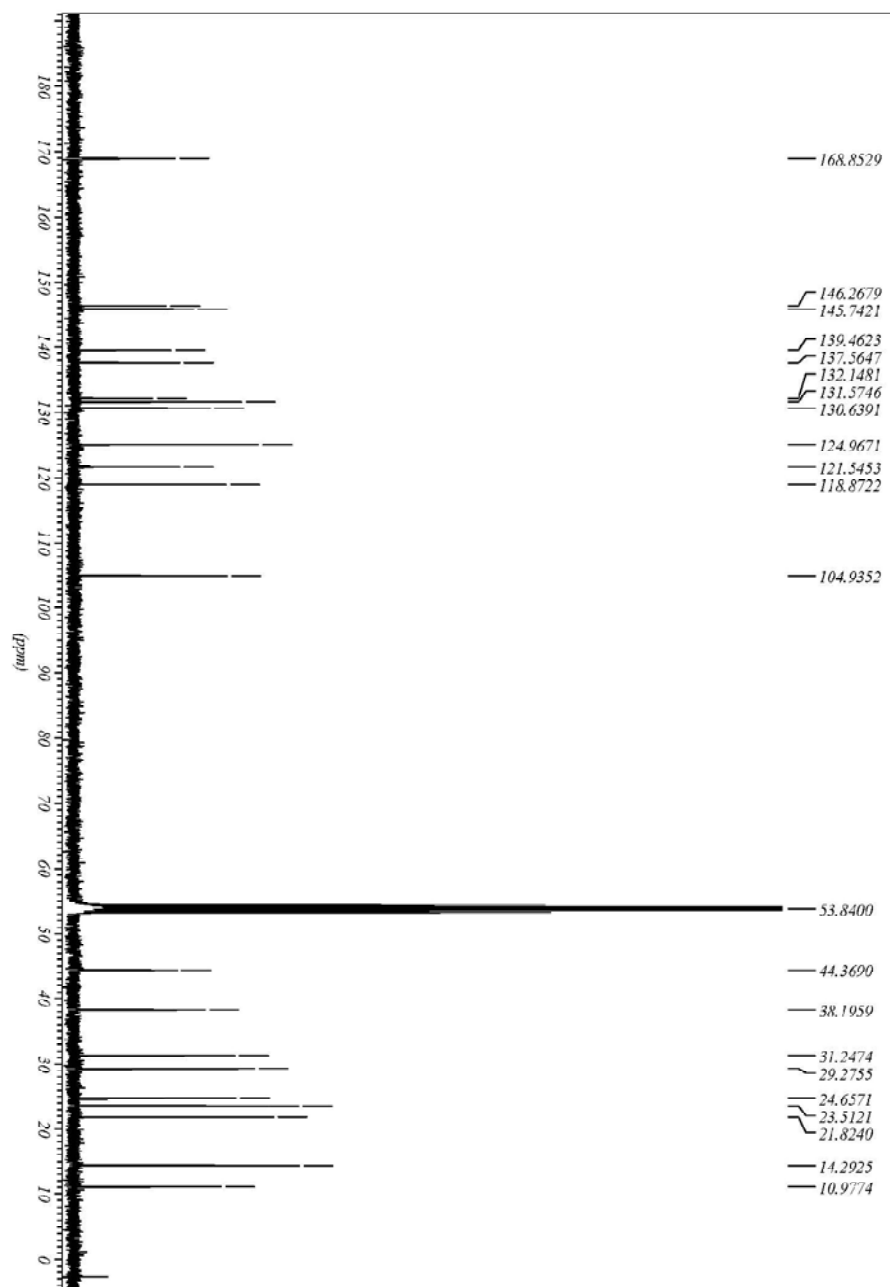

**Fig. S 14** 101 MHz <sup>13</sup>C NMR spectrum of **3c** in CD<sub>2</sub>Cl<sub>2</sub>.



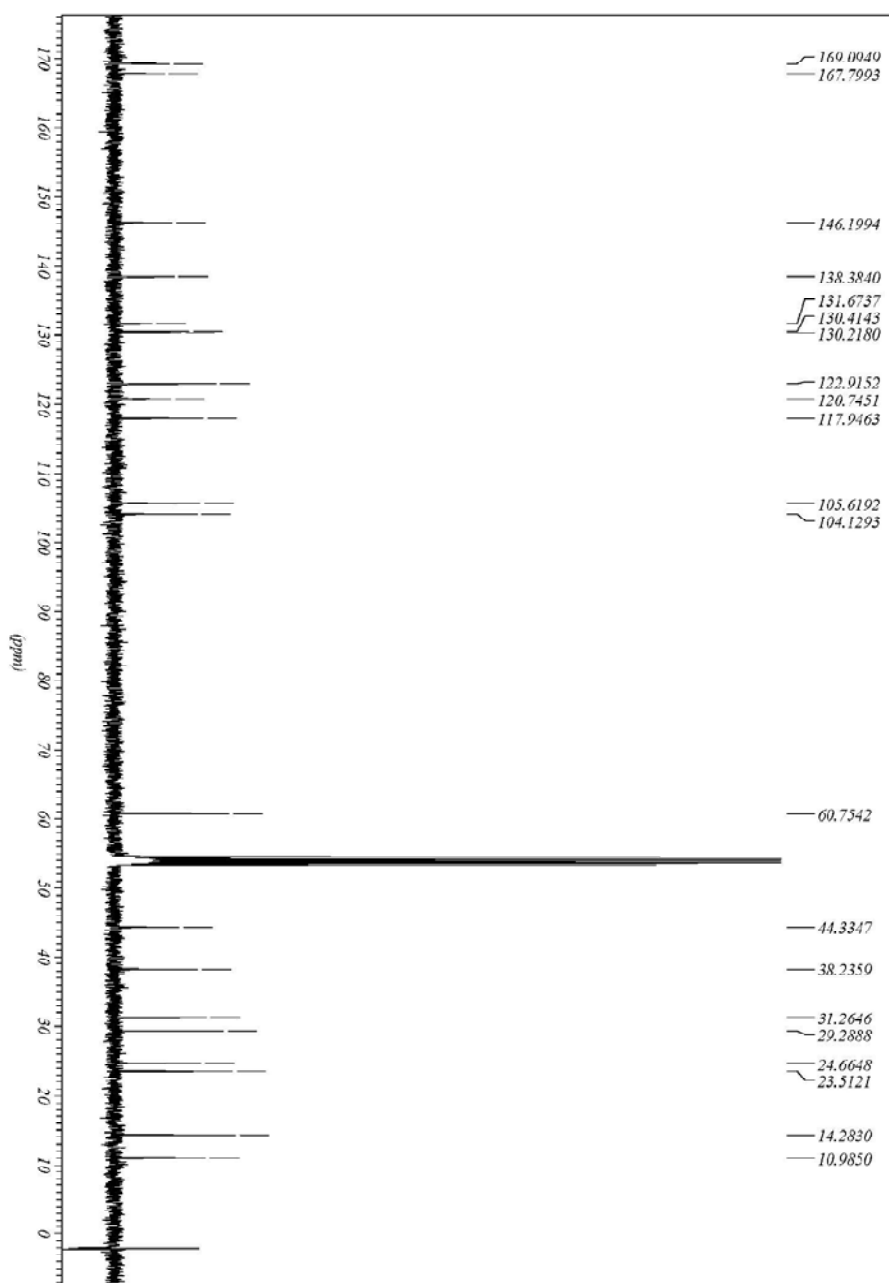

**Fig. S 15** 101 MHz <sup>13</sup>C NMR spectrum of **3d** in CD<sub>2</sub>Cl<sub>2</sub>.

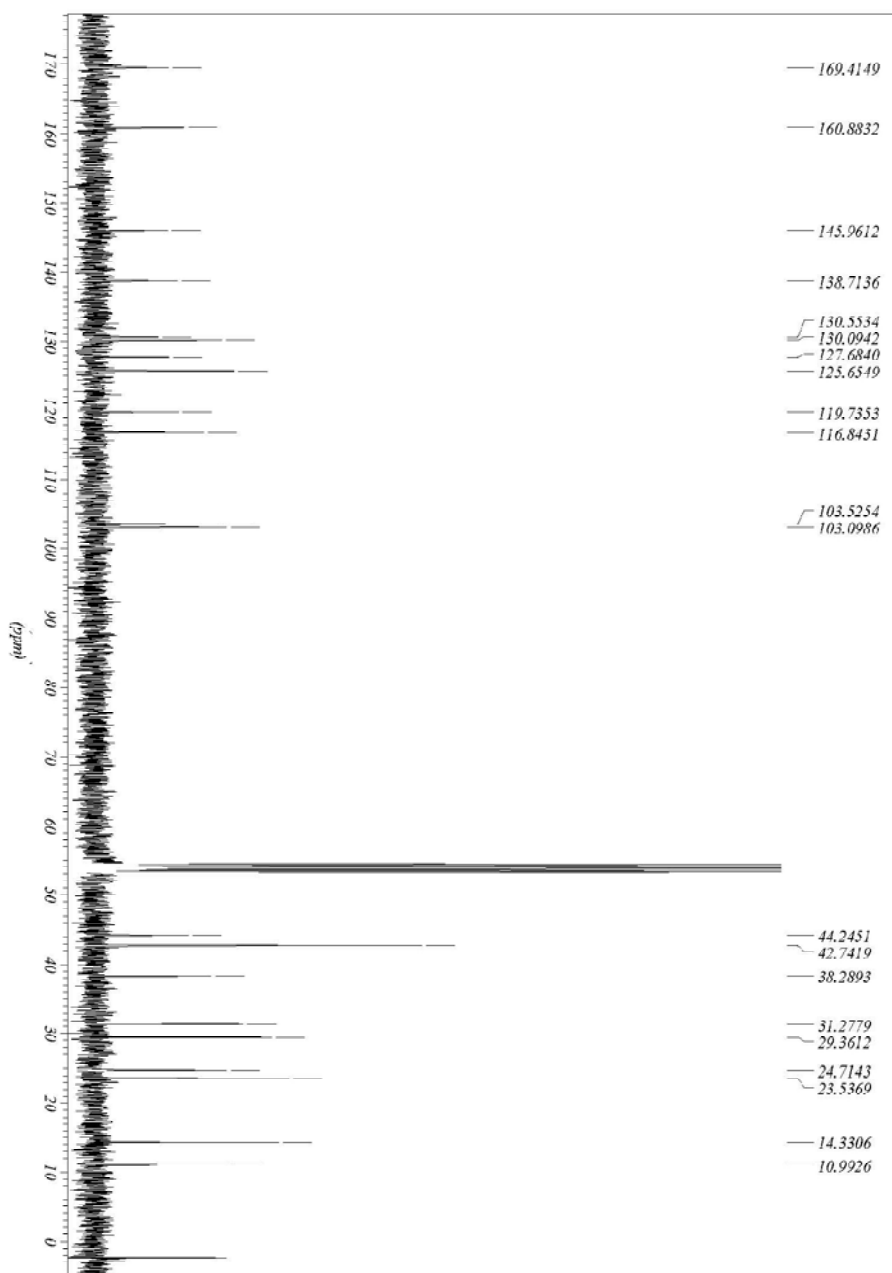

**Fig. S 16** 101 MHz  $^{13}\text{C}$  NMR spectrum of **3e** in  $\text{CD}_2\text{Cl}_2$ .

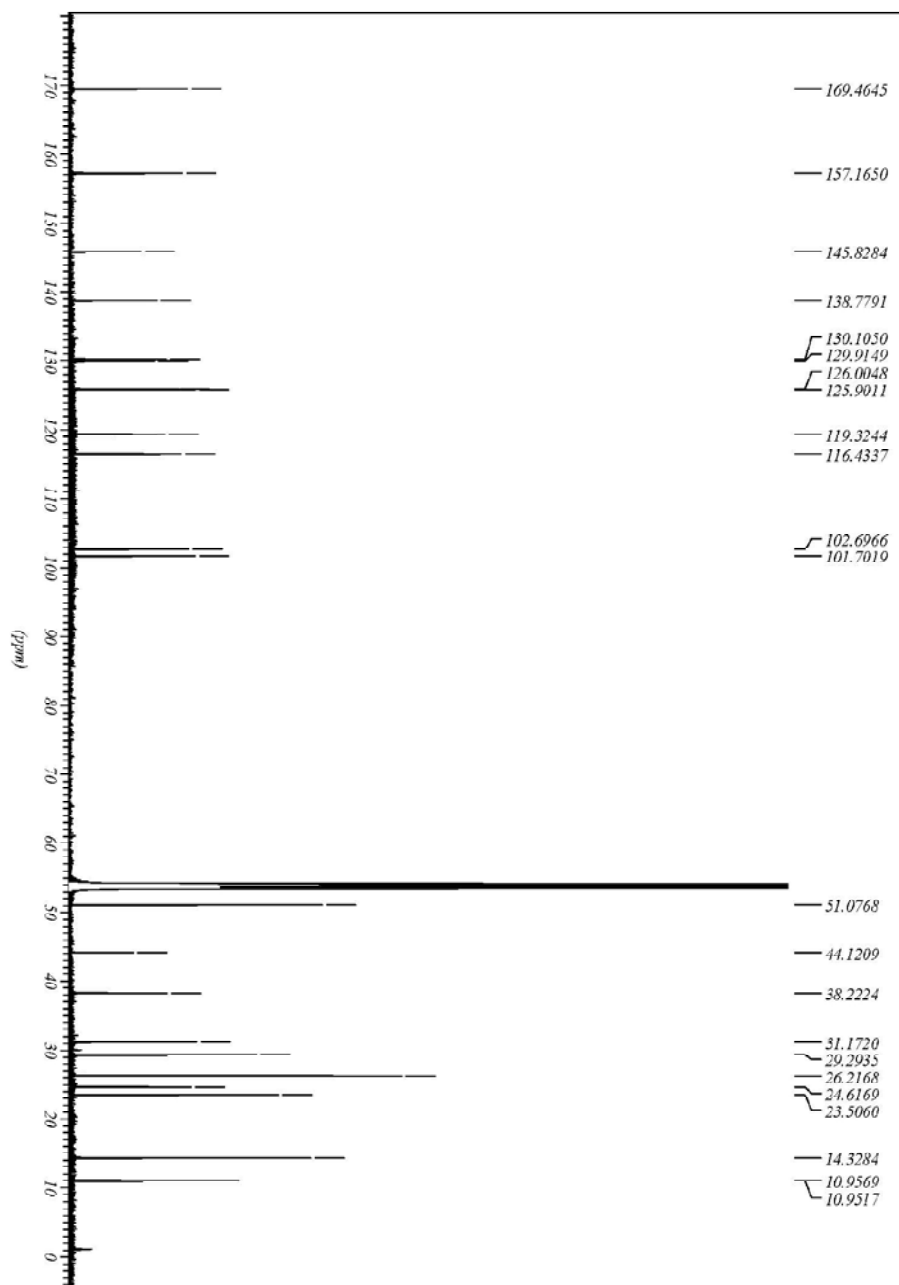

**Fig. S 17** 151 MHz  $^{13}\text{C}$  NMR spectrum of **3f** in  $\text{CD}_2\text{Cl}_2$ .

#### 4. References

- 1 A. D. Becke, *Phys. Rev. A*, 1988, **38**, 3098; C. Lee, W. Yang and R. G. Parr; *Phys. Rev. B*, 1988, **37**, 785; A. D. Becke, *J. Chem. Phys.* 1993, **98**, 5648.
- 2 R. Ahlrichs, M. Bär, M. Häser, H. Horn and C. Köhmel, *Chem. Phys. Lett.*, 1989, **162**, 165; R. Ahlrichs and M. von Arnim, *Methods and Techniques in Computational Chemistry: METECC-95*; Clementi, E.; Corongiu, G., Eds.; Club Européen MOTECC, 1995.
- 3 A. Schäfer, C. Huber and R. Ahlrichs, *J. Chem. Phys.*, 1994, **100**, 5829.
- 4 R. F. Fink, J. Seibt, V. Engel, M. Renz, M. Kaupp, S. Lochbrunner, H.-M. Zhao, J. Pfister, F. Würthner and B. Engels, *J. Am. Chem. Soc.*, 2008, **130**, 12858.
- 5 O. Treutler and R. Ahlrichs, *J. Chem. Phys.*, 1995, **102**, 346.
- 6 K. Eichkorn, F. Weigend, O. Treutler and R. Ahlrichs, *Theor. Chim. Acta*, 1997, **97**, 119.
